# Supplementary material for: Physicochemical and thermodynamic evaluation of ibrutinib cocrystal formation with a long-chain fatty acid
Source: Royal Society of Chemistry journal article supplement (doi:10.1039/d2ce01216b), 2022-12-12
Supplement: d2ce01216b1.pdf [file d2ce01216b1.pdf]

# Physicochemical and Thermodynamic Evaluation of Ibrutinib Cocrystal Formation with a Long Chain Fatty Acid

*Shubhanshu Ranjan Tiwari, Shanmukha Prasad Gopi, Divya Jyothi Kallem, Deepika  
Chaturvedi, Raja Sekhar Voguri, Srividya Ramakrishnan, Archan Dey\*, Sharmistha Pal\**

*IPDO, Dr. Reddys Laboratory, Bachupally, Hyderabad, Telangana, India*

**Corresponding Author:** [archan\\_dey@yahoo.co.in](mailto:archan_dey@yahoo.co.in); [sharmisthapaldatta@drreddys.com](mailto:sharmisthapaldatta@drreddys.com)

## Supporting Information

**Table S1.** Crystallographic data of polymorphs and solvates of Ibrutinib

| Parameters                 | Solvates                                                                                                     |                                                                                                               |                                                                                                              |                                                                                                                              |                                                                                                                              |                                                                                                                              |                                                                                                               |                                                                                                 |                                                                                                |                                                                                   | Anhydrous polymorphs                                          |                                                               |
|----------------------------|--------------------------------------------------------------------------------------------------------------|---------------------------------------------------------------------------------------------------------------|--------------------------------------------------------------------------------------------------------------|------------------------------------------------------------------------------------------------------------------------------|------------------------------------------------------------------------------------------------------------------------------|------------------------------------------------------------------------------------------------------------------------------|---------------------------------------------------------------------------------------------------------------|-------------------------------------------------------------------------------------------------|------------------------------------------------------------------------------------------------|-----------------------------------------------------------------------------------|---------------------------------------------------------------|---------------------------------------------------------------|
| Name                       | 4-hydroxy-4-methylpentan-2-one <sup>1</sup>                                                                  | Dioxolane <sup>1</sup>                                                                                        | Trifluorotoluene <sup>1</sup>                                                                                | O-Xylene <sup>1</sup>                                                                                                        | M-Xylene <sup>1</sup>                                                                                                        | P-Xylene <sup>1</sup>                                                                                                        | Anisole <sup>1</sup>                                                                                          | Chlorobenzene <sup>1</sup>                                                                      | Fluorobenzene <sup>2</sup>                                                                     | Methanol <sup>3</sup>                                                             | Ibrutinib polymorph A <sup>3</sup>                            | Ibrutinib polymorph C <sup>3</sup>                            |
| CCDC                       | HAWLOJ                                                                                                       | HAWLID                                                                                                        | HAWMIE                                                                                                       | HAWMAW                                                                                                                       | HAWLUP                                                                                                                       | HAWMEA                                                                                                                       | HAWLAV                                                                                                        | HAWLEZ                                                                                          | LAGVEY                                                                                         | RUYDEW                                                                            | BETXEG                                                        | BETXEG01                                                      |
| Formula                    | C <sub>25</sub> H <sub>24</sub> N <sub>6</sub> O <sub>2</sub> ·C <sub>6</sub> H <sub>12</sub> O <sub>2</sub> | C <sub>25</sub> H <sub>24</sub> N <sub>6</sub> O <sub>2</sub> ·2·C <sub>3</sub> H <sub>6</sub> O <sub>2</sub> | C <sub>25</sub> H <sub>24</sub> N <sub>6</sub> O <sub>2</sub> ·C <sub>6</sub> H <sub>5</sub> CF <sub>3</sub> | C <sub>25</sub> H <sub>24</sub> N <sub>6</sub> O <sub>2</sub> ·C <sub>6</sub> H <sub>4</sub> (CH <sub>3</sub> ) <sub>2</sub> | C <sub>25</sub> H <sub>24</sub> N <sub>6</sub> O <sub>2</sub> ·C <sub>6</sub> H <sub>4</sub> (CH <sub>3</sub> ) <sub>2</sub> | C <sub>25</sub> H <sub>24</sub> N <sub>6</sub> O <sub>2</sub> ·C <sub>6</sub> H <sub>4</sub> (CH <sub>3</sub> ) <sub>2</sub> | C <sub>25</sub> H <sub>24</sub> N <sub>6</sub> O <sub>2</sub> ·CH <sub>3</sub> OC <sub>6</sub> H <sub>5</sub> | C <sub>25</sub> H <sub>24</sub> N <sub>6</sub> O <sub>2</sub> ·C <sub>6</sub> H <sub>5</sub> Cl | C <sub>25</sub> H <sub>24</sub> N <sub>6</sub> O <sub>2</sub> ·C <sub>6</sub> H <sub>5</sub> F | C <sub>25</sub> H <sub>24</sub> N <sub>6</sub> O <sub>2</sub> ·CH <sub>3</sub> OH | C <sub>25</sub> H <sub>24</sub> N <sub>6</sub> O <sub>2</sub> | C <sub>25</sub> H <sub>24</sub> N <sub>6</sub> O <sub>2</sub> |
| Formula weight             | 570.64                                                                                                       | 514.59                                                                                                        | 586.61                                                                                                       | 546.64                                                                                                                       | 546.66                                                                                                                       | 546.68                                                                                                                       | 548.64                                                                                                        | 553.05                                                                                          | 536.6                                                                                          | 472.54                                                                            | 440.50                                                        | 440.50                                                        |
| Crystal system             | triclinic                                                                                                    | triclinic                                                                                                     | triclinic                                                                                                    | triclinic                                                                                                                    | triclinic                                                                                                                    | triclinic                                                                                                                    | triclinic                                                                                                     | triclinic                                                                                       | triclinic                                                                                      | triclinic                                                                         | monoclinic                                                    | triclinic                                                     |
| Space group                | <i>P</i> 1                                                                                                   | <i>P</i> 1                                                                                                    | <i>P</i> 1                                                                                                   | <i>P</i> 1                                                                                                                   | <i>P</i> 1                                                                                                                   | <i>P</i> 1                                                                                                                   | <i>P</i> 1                                                                                                    | <i>P</i> 1                                                                                      | <i>P</i> 1                                                                                     | <i>P</i> 1                                                                        | <i>P</i> 2 <sub>1</sub>                                       | <i>P</i> 1                                                    |
| <i>a</i> (Å)               | 10.7491(2)                                                                                                   | 9.9709(2)                                                                                                     | 10.9962(2)                                                                                                   | 11.3206(2)                                                                                                                   | 10.1055(2)                                                                                                                   | 10.1530(3)                                                                                                                   | 9.9939(2)                                                                                                     | 11.0598(4)                                                                                      | 9.6355 (2)                                                                                     | 9.6578(3)                                                                         | 14.2459(10)                                                   | 9.7764(10)                                                    |
| <i>b</i> (Å)               | 11.6814(2)                                                                                                   | 14.8343(2)                                                                                                    | 11.9991(2)                                                                                                   | 15.6063(3)                                                                                                                   | 10.4590(2)                                                                                                                   | 10.7810(2)                                                                                                                   | 10.2957(2)                                                                                                    | 11.8540(4)                                                                                      | 11.0547 (2)                                                                                    | 9.8034(3)                                                                         | 10.1261(10)                                                   | 10.0551(11)                                                   |
| <i>c</i> (Å)               | 13.4100(3)                                                                                                   | 17.4937(2)                                                                                                    | 12.0896(2)                                                                                                   | 16.6997(3)                                                                                                                   | 13.8796(2)                                                                                                                   | 14.5247(3)                                                                                                                   | 13.9251(3)                                                                                                    | 11.9400(4)                                                                                      | 14.2260 (3)                                                                                    | 15.0204(5)                                                                        | 30.8586(10)                                                   | 13.459(2)                                                     |
| $\alpha$ (deg)             | 75.3769(17)                                                                                                  | 80.5116(11)                                                                                                   | 79.7179(16)                                                                                                  | 87.2953(13)                                                                                                                  | 95.3990(12)                                                                                                                  | 82.5381(19)                                                                                                                  | 94.7775(17)                                                                                                   | 81.279(3)                                                                                       | 73.2323 (18)                                                                                   | 105.705(3)                                                                        | 90                                                            | 90.959(11)                                                    |
| $\beta$ (deg)              | 69.4688(17)                                                                                                  | 78.5650(13)                                                                                                   | 71.7985(18)                                                                                                  | 76.7525(15)                                                                                                                  | 100.2221(15)                                                                                                                 | 71.019(2)                                                                                                                    | 100.3620(17)                                                                                                  | 67.786(3)                                                                                       | 82.1198 (15)                                                                                   | 95.072(2)                                                                         | 96.908(10)                                                    | 110.369(12)                                                   |
| $\gamma$ (deg)             | 64.9843(17)                                                                                                  | 74.3710(14)                                                                                                   | 69.0665(19)                                                                                                  | 79.8121(15)                                                                                                                  | 116.7545(18)                                                                                                                 | 77.858(2)                                                                                                                    | 116.113(2)                                                                                                    | 72.096(3)                                                                                       | 66.0320 (19)                                                                                   | 111.523(3)                                                                        | 90                                                            | 112.917(10)                                                   |
| <i>V</i> (Å <sup>3</sup> ) | 1418.14(3)                                                                                                   | 2425.30(7)                                                                                                    | 1411.29(2)                                                                                                   | 2826.52(5)                                                                                                                   | 1263.623(18)                                                                                                                 | 1466.54(3)                                                                                                                   | 1243.99(3)                                                                                                    | 1377.89(5)                                                                                      | 1325.44 (5)                                                                                    | 1245.28(8)                                                                        | 4419.2(6)                                                     | 1124.5(3)                                                     |
| <i>Z</i>                   | 2                                                                                                            | 4                                                                                                             | 2                                                                                                            | 4                                                                                                                            | 1                                                                                                                            | 2                                                                                                                            | 1                                                                                                             | 2                                                                                               | 2                                                                                              | 1                                                                                 | 2                                                             | 1                                                             |
| CCDC no.                   | 1525561                                                                                                      | 1525560                                                                                                       | 1525565                                                                                                      | 1525563                                                                                                                      | 1525562                                                                                                                      | 1525564                                                                                                                      | 1525558                                                                                                       | 1525559                                                                                         | 1955809                                                                                        | 1559243                                                                           | 1559244                                                       | 1559242                                                       |

Note: Ibrutinib-nicotinic acid eutectic cocrystal is reported to have has a chiral space group *P*2<sub>1</sub> with cell parameters of:  $\alpha=90.00^\circ$ ,  $\beta=101.19^\circ$ ,  $\gamma=90.00^\circ$  <sup>4</sup>

**Table S2.** Crystallographic data of palmitic acid<sup>5</sup>

|                            |                                                  |
|----------------------------|--------------------------------------------------|
| Palmitic acid Form         | YEFWEM01                                         |
| Empirical formula          | C <sub>16</sub> H <sub>31</sub> O <sub>2</sub> H |
| Formula weight             | 256.4                                            |
| Crystal system             | Orthorhombic                                     |
| Space group                | P21/c                                            |
| <i>a</i> (Å)               | 35.72(1)                                         |
| <i>b</i> (Å)               | 4.975(1)                                         |
| <i>c</i> (Å)               | 9.439(1)                                         |
| $\alpha$ (deg)             | 90                                               |
| $\beta$ (deg)              | 90.38                                            |
| $\gamma$ (deg)             | 90                                               |
| <i>V</i> (Å <sup>3</sup> ) | 1677.2                                           |
| <i>Z</i>                   | 4                                                |
| CCDC no.                   | 738619                                           |

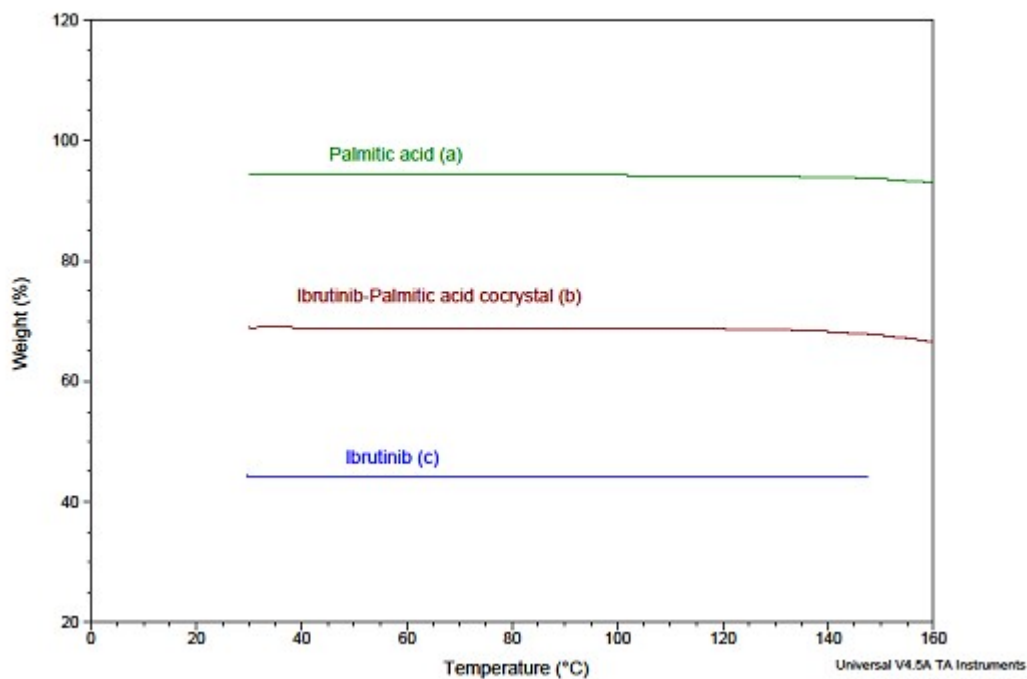

**Figure S1.** TGA of (a) Palmitic acid, (b) IBT-PAL cocrystal, (c) Ibrutinib

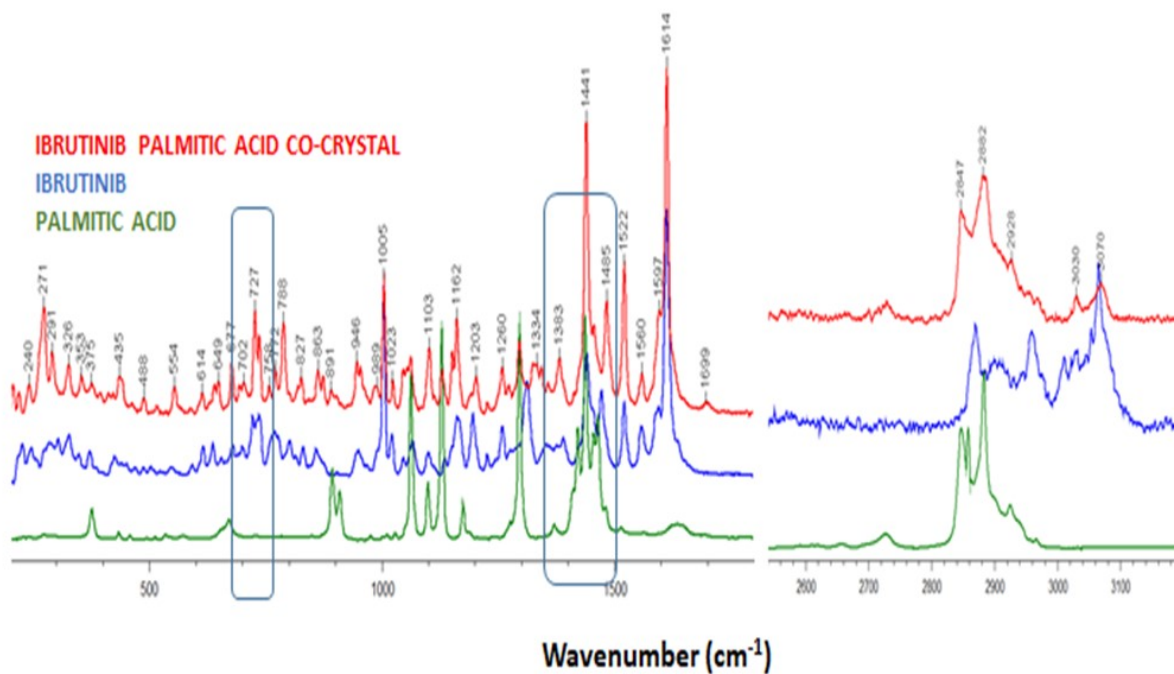

**Figure S2.** Raman spectra of Ibrutinib, Palmitic acid and IBT-PAL cocrystal

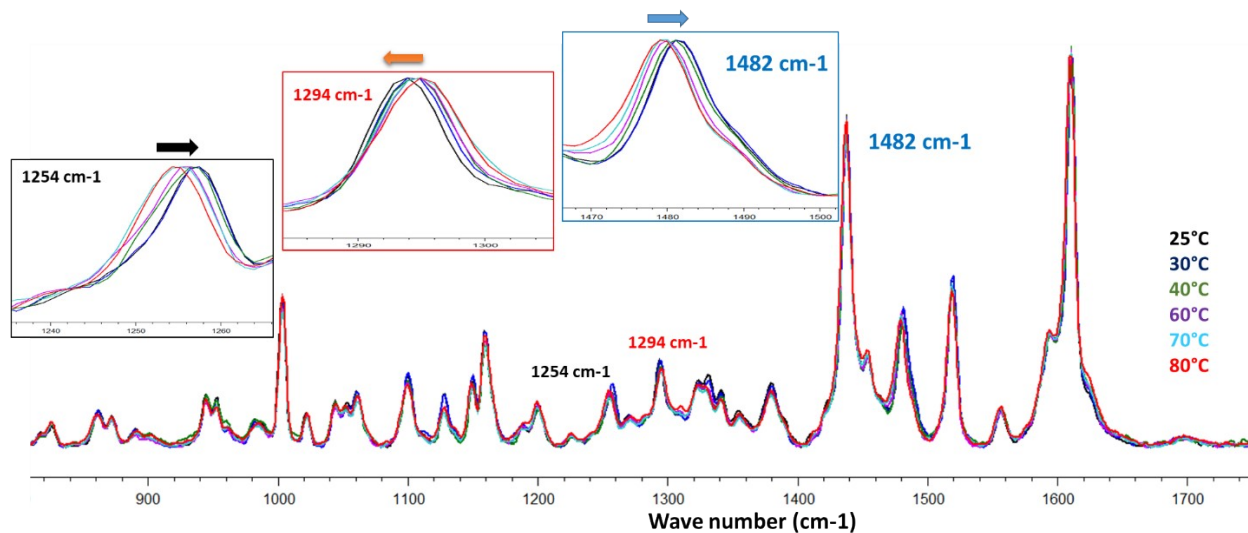

**Figure S3.** Overlay of variable temperature Raman study of IBT-PAL cocrystal.

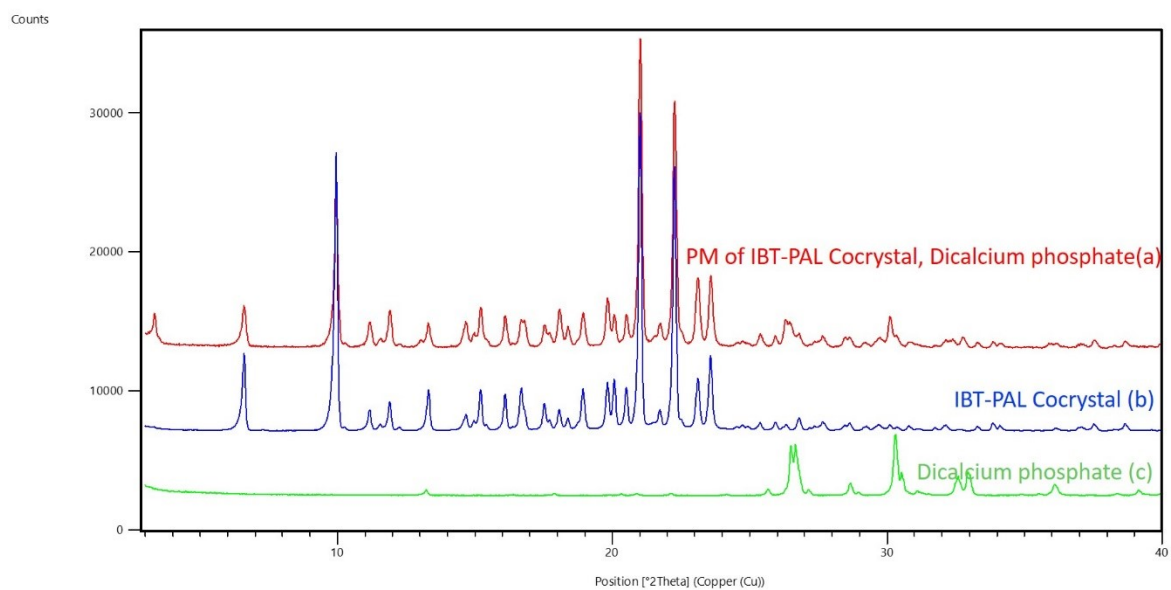

**Figure S4.** PXRD of a) Physical mixture (PM) of IBT-PAL cocrystal, dicalcium phosphate

exposed to  $30 \pm 2$  °C/80 % RH for 30 days, b) IBT-PAL cocrystal and c) Dicalcium phosphate

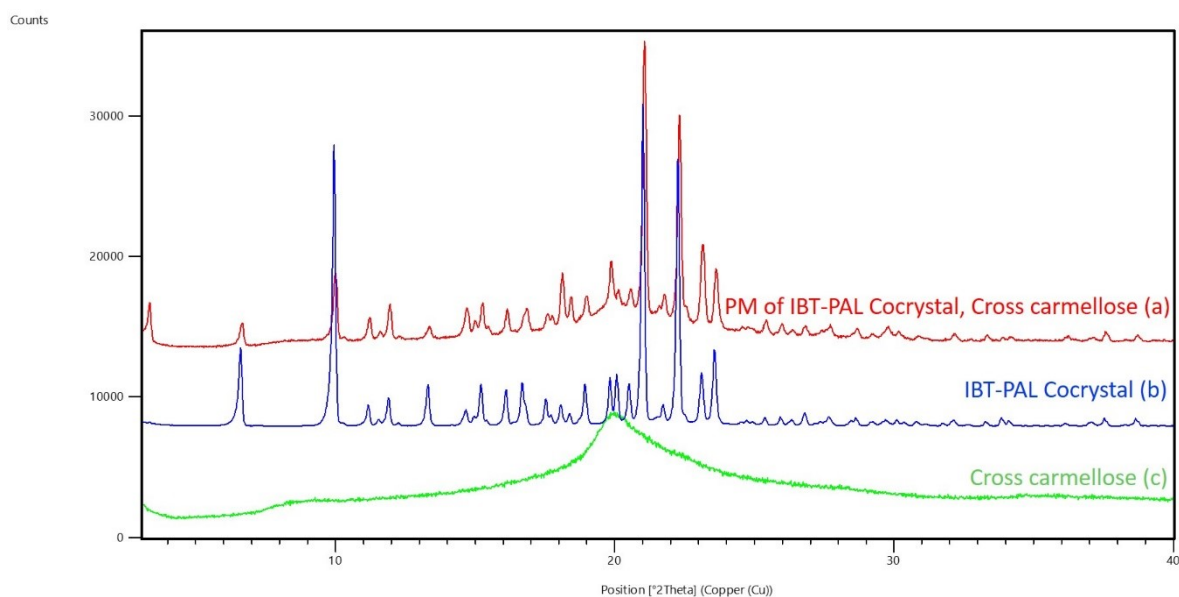

**Figure S5.** PXRD of a) Physical mixture (PM) of IBT-PAL cocrystal, cross carmellose exposed to  $30 \pm 2$  °C/80 % RH for 30 days, b) IBT-PAL cocrystal and c) Cross carmellose

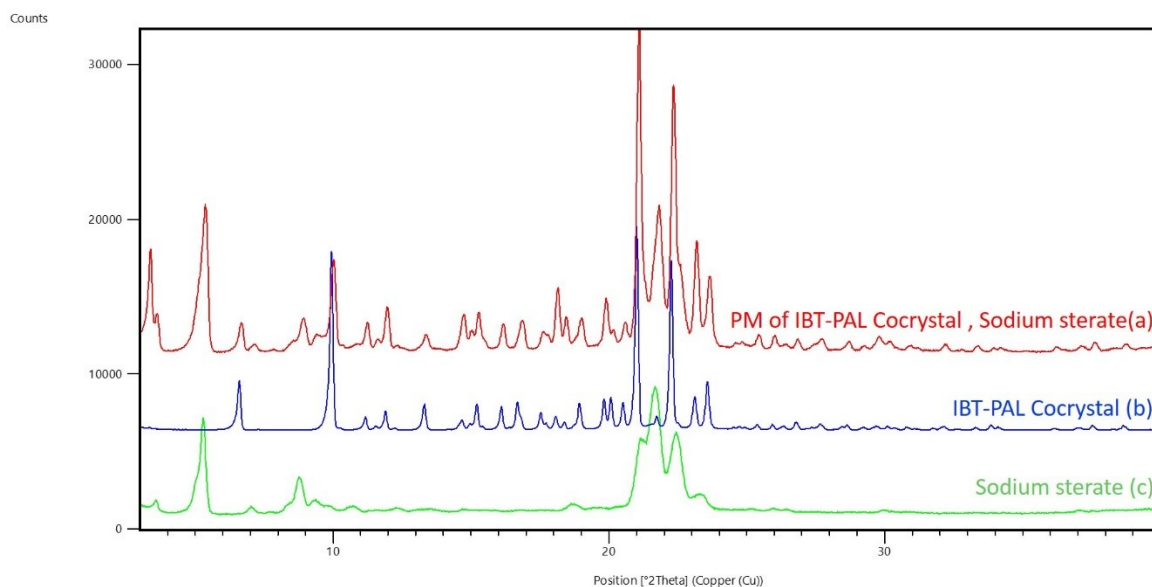

**Figure S6.** PXRD of a) Physical mixture (PM) of IBT-PAL cocrystal, sodium stearate exposed to  $30 \pm 2$  °C/80 % RH for 30 days b) IBT-PAL cocrystal and c) Sodium stearate

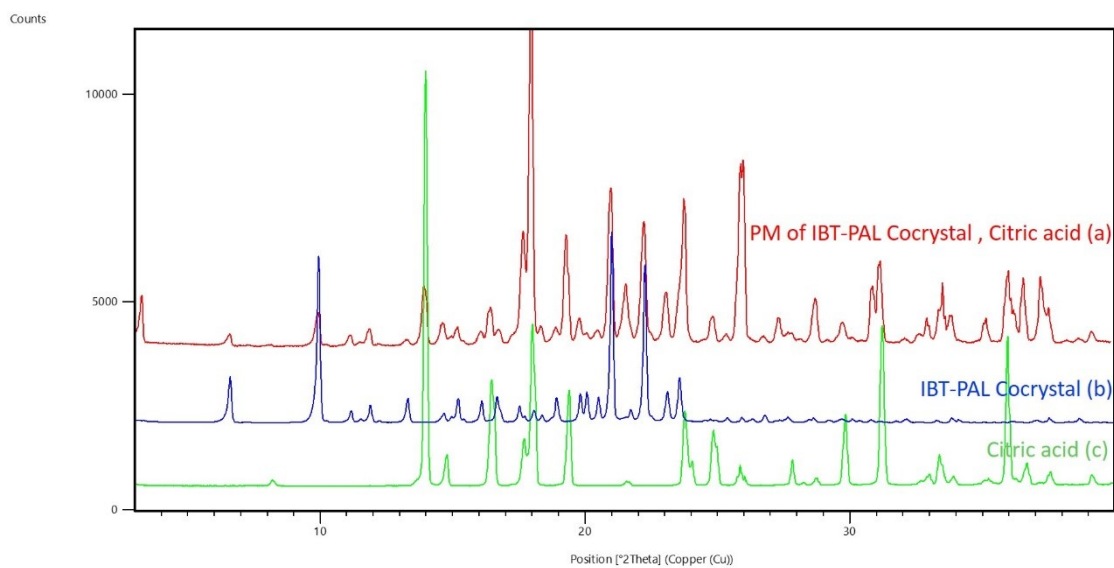

**Figure S7.** PXR D of a) Physical mixture (PM) of IBT-PAL cocystal, citric acid exposed to  $30\pm 2$  °C/80 % RH for 30 days, b) IBT-PAL cocystal and c) Citric acid

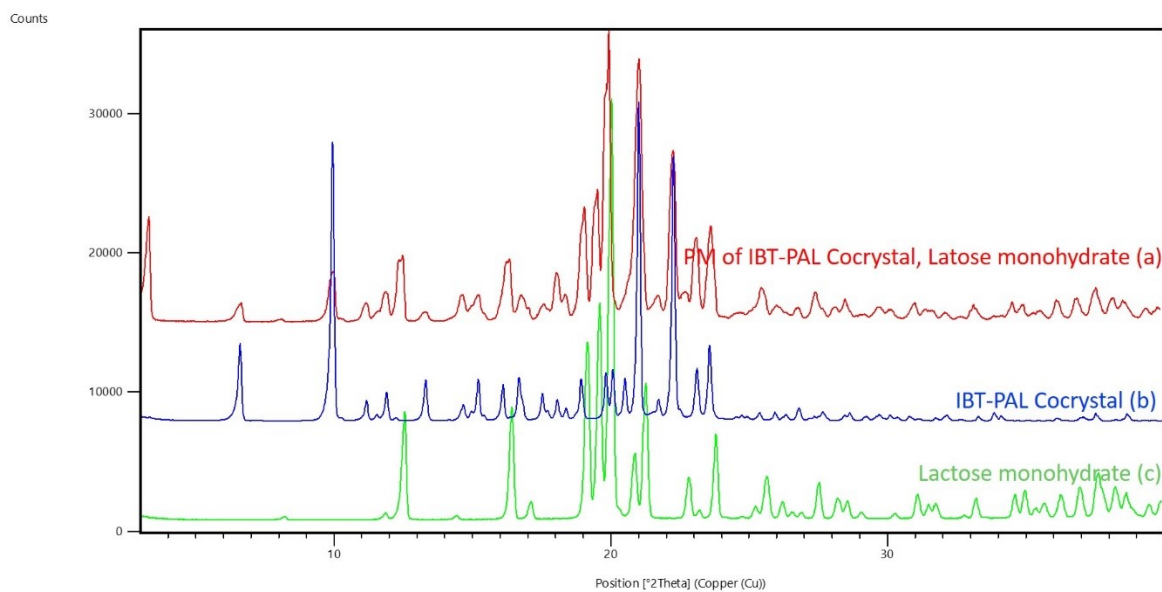

**Figure S8.** PXR D of a) Physical mixture (PM) of IBT-PAL cocystal, lactose monohydrate exposed to  $30\pm 2$  °C/80 % RH for 30 days, b) IBT-PAL cocystal and c) Lactose monohydrate

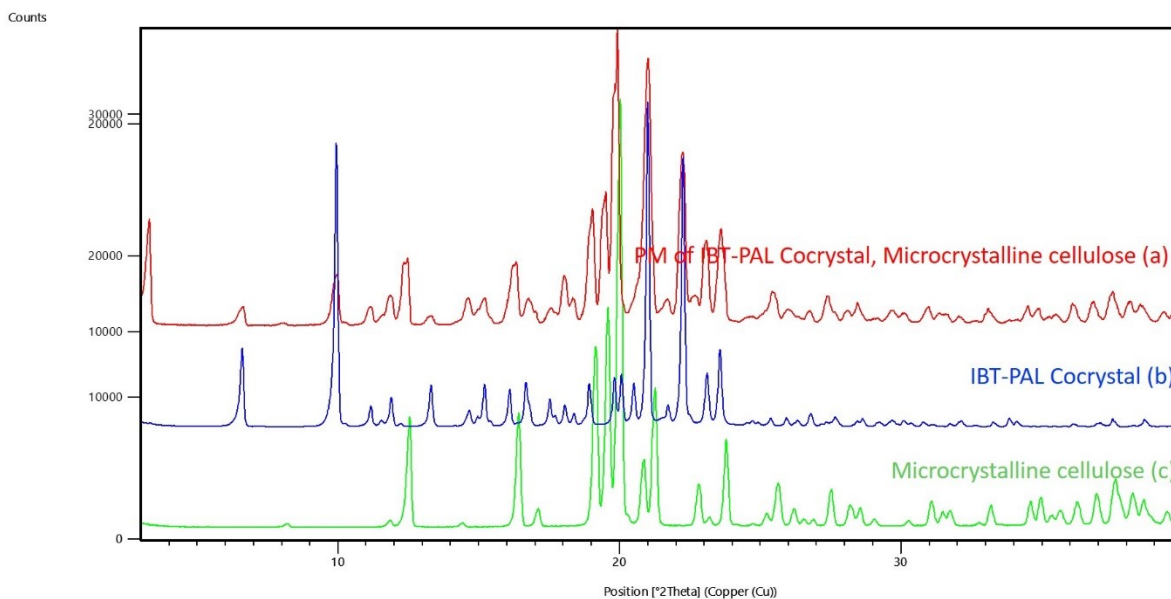

**Figure S9.** PXRD of a) Physical mixture (PM) of IBT-PAL cocrystal, microcrystalline cellulose exposed to  $30\pm 2$  °C/80 % RH for 30 days, b) IBT-PAL cocrystal and c) Microcrystalline cellulose

## References

- (1) Zvoniček, V.; Skořepová, E.; Dušek, M.; Babor, M.; Žvátora, P.; Šooš, M. First Crystal Structures of Pharmaceutical Ibrutinib: Systematic Solvate Screening and Characterization. *Crystal Growth and Design* **2017**, *17* (6), 3116–3127. <https://doi.org/10.1021/acs.cgd.7b00047>.
- (2) Rohlíček, J.; Zvoniček, V.; Skořepová, E.; Šooš, M. Testing the Flow-through Capillary for the Study of Re-Solvation Processes in Pharmaceutical Compounds. *Powder Diffraction* **2020**, *35* (3). <https://doi.org/10.1017/S0885715620000354>.
- (3) Zvoniček, V.; Skořepová, E.; Dušek, M.; Žvátora, P.; Šooš, M. Ibrutinib Polymorphs: Crystallographic Study. *Crystal Growth and Design* **2018**, *18* (3), 1315–1326. <https://doi.org/10.1021/acs.cgd.7b00923>.
- (4) Zhang, G.; Zhai, L.; Zhang, M.; Xia, X.; Wang, J. Ibrutinib-Nicotinic Acid Eutectic Crystal and Preparation Method Thereof. *CN114685512A*. **2022**.
- (5) Moreno-Calvo, E.; Gbabode, G.; Cordobilla, R.; Calvet, T.; Cuevas-Diarte, M. À.; Negrier, P.; Mondieig, D. Competing Intermolecular Interactions in the High-Temperature Solid Phases of Even Saturated Carboxylic Acids (C<sub>10</sub>H<sub>19</sub>O<sub>2</sub>H to C<sub>20</sub>H<sub>39</sub>O<sub>2</sub>H). *Chemistry - A European Journal* **2009**, *15* (47). <https://doi.org/10.1002/chem.200901831>.
